# Supplementary material for: Synergistic effect of upconversion and plasmons in NaYF4:Yb3+, Er3+, Tm3+@TiO2–Ag composites for MO photodegradation
Source: Royal Society of Chemistry journal article supplement (doi:10.1039/c7ra09368c), 2017-01-01
Supplement: c7ra09368c1.pdf [file c7ra09368c1.pdf]

## Electronic Supplementary Information

### Synergistic effect of upconversion and plasmons in NaYF<sub>4</sub>:Yb<sup>3+</sup>, Er<sup>3+</sup>, Tm<sup>3+</sup>@TiO<sub>2</sub>-Ag composites for MO photodegradation

Yu Gao,<sup>†b</sup> Cheng Shi,<sup>†a</sup> Jinzhao Feng,<sup>b</sup> Guiyan Zhao,<sup>a</sup> He Yu,<sup>b</sup> Yanfeng Bi,<sup>\*a</sup> Fu Ding,<sup>\*b</sup>  
Yaguang Sun,<sup>b</sup> Zhenhe Xu,<sup>\*b</sup>

<sup>a</sup>College of Chemistry, Chemical Engineering and Environmental Engineering, Liaoning Shihua University, Fushun 113001, P. R. China.

<sup>b</sup>The Key Laboratory of Inorganic Molecule-Based Chemistry of Liaoning Province, College of Applied Chemistry, Shenyang University of Chemical Technology, Shenyang, 110142, China

E-mail: [xuzh@syuct.edu.cn](mailto:xuzh@syuct.edu.cn) (Z. Xu), [biyanfeng@lnpu.edu.cn](mailto:biyanfeng@lnpu.edu.cn) (Y. Bi)

† These authors contributed equally

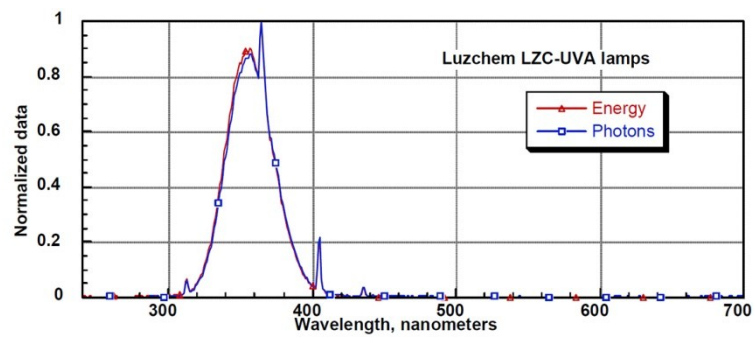

Fig. S1 Emission spectrum of LZC-UVA lamps.

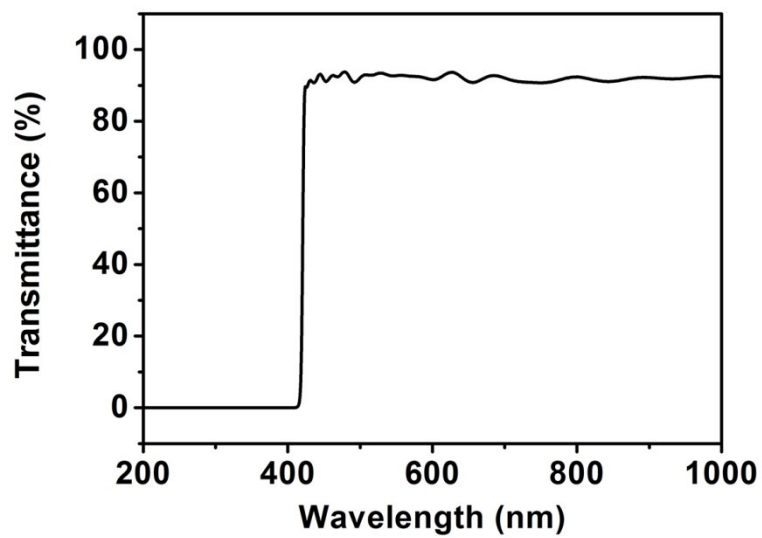

Fig. S2 Transmission spectra of the 420 nm long-pass filter.

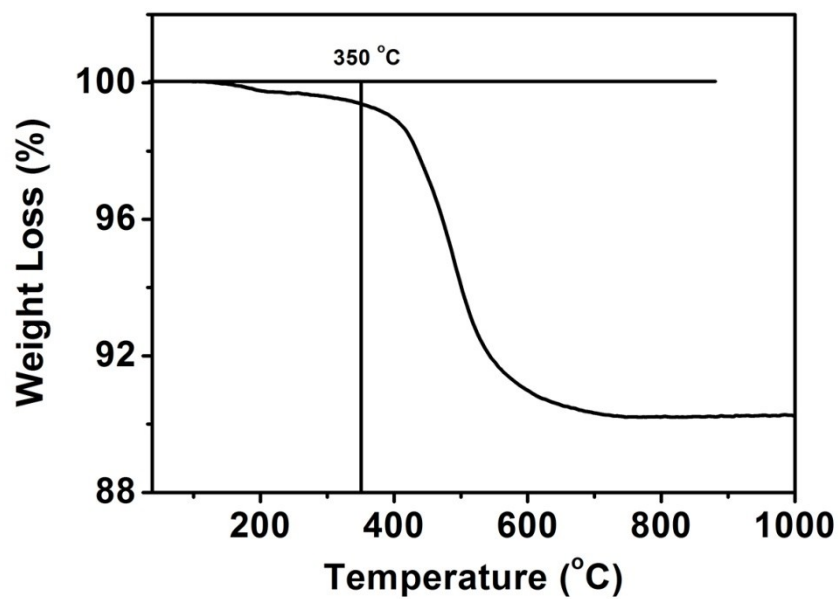

Fig. S3 TGA curve of the NYF@TiO<sub>2</sub>-3%Ag sample.
